# Supplementary material
Source: Springer Nature journal article supplement (https://www.springermedizin.de/resource/supplementary/12885_2012_3530_MOESM2_ESM.pdf/9463586)

### Practical problems over 12 months

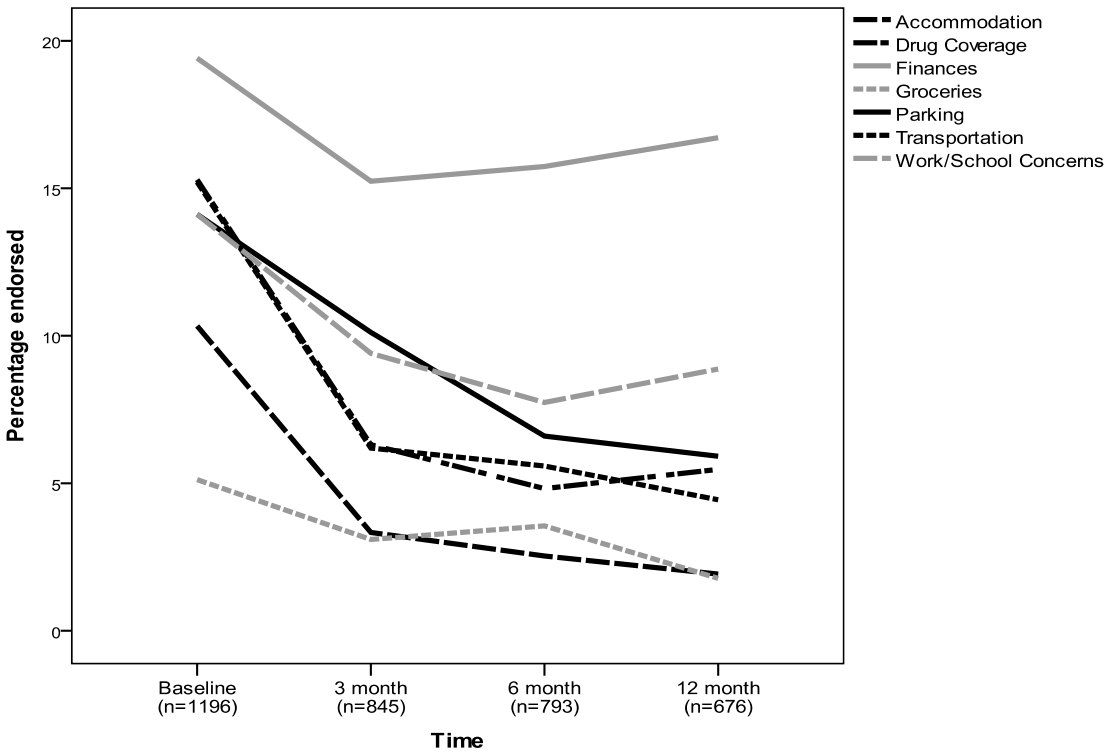

### Psychosocial problems over 12 months

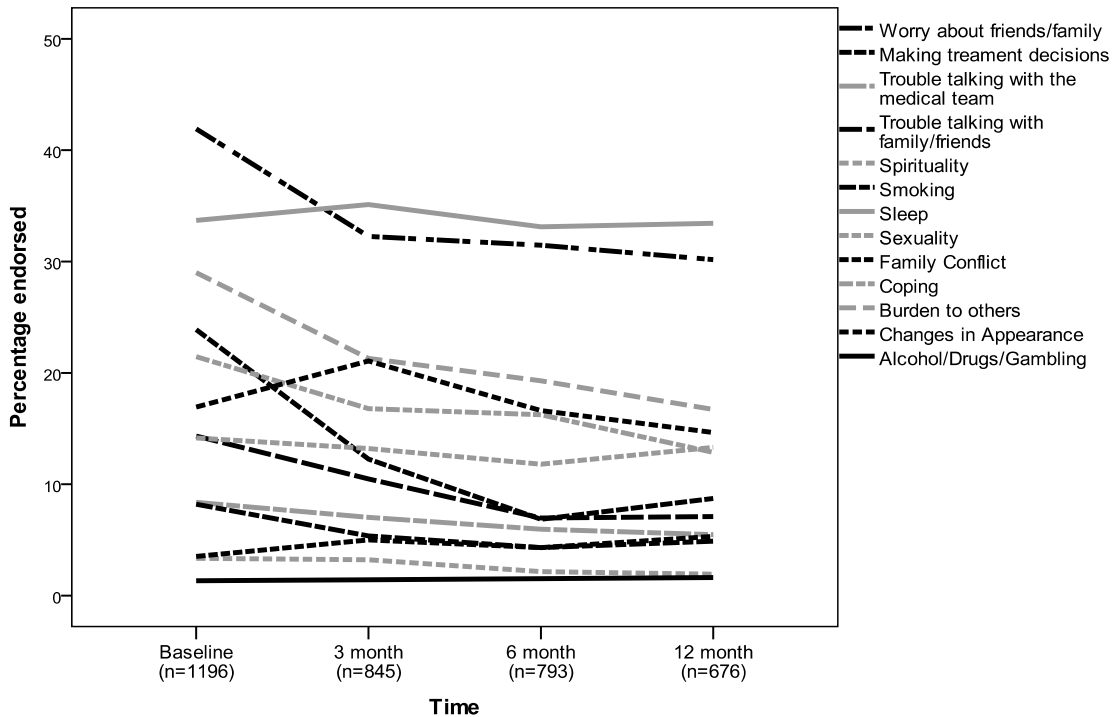

Supplement: MOESM2 [file 9463586]
